# Supplementary material for: The ALFA (Activity Log Files Aggregation) Toolkit: A Method for Precise Observation of the Consultation
Source: PubMed Central journal article supplement (PMC2629369; doi:10.2196/jmir.1080), 2008-09-08
Supplement: jmir_v10i4e27_app6.pdf [file jmir_v10i4e27_app6.pdf]

## User Activity Recording (UAR) Tool

### General Copyright statement

User Activity Recording (UAR) Tool V1.0

Copyright (C) 2008 Biomedical Informatics (BMI), St George's University of London. Citations to the toolkit should be as 'de Lusignan S, Kumarapeli P, Chan T, Pflug B, van Vlymen J, Jones B, Freeman GK. The ALFA (activity Log Files Aggregation) toolkit: a method for precise observation of the consultation. <*J Med Internet Res* 2008; ..>.

This program is free software: you can redistribute it and/or modify it under the terms of the GNU General Public License as published by the Free Software Foundation, either version 3 of the License, or (at your option) any later version.

This program is distributed in the hope that it will be useful, but WITHOUT ANY WARRANTY; without even the implied warranty of MERCHANTABILITY or FITNESS FOR A PARTICULAR PURPOSE. See the GNU General Public License for more details.

You should have received a copy of the GNU General Public License along with this program. If not, see <<http://www.gnu.org/licenses/>>.

Any redistributions/public demonstration/publication/use of this software should acknowledge the original developers mentioned above as the Copyright holders. It is also encouraged to inform the original developers about such activities in order to assure the consistency among future software versions and to keep potential users up-to-date.

### Source codes

**Language:** Microsoft Visual Basic 6.0

**Platform:** Microsoft Windows

### Src1: frmMouse.frm

` VB form for the recorder interface and functionality

` User Action Recodering (UAR) tool V1.0

` Copyright (C) 2008 Biomedical Informatics (BMI), St George's University of London. Citations to  
` the toolkit should be as 'de Lusignan S, Kumarapeli P, Chan T, Pflug B, van Vlymen J, Jones B,  
` Freeman GK. The ALFA (activity Log Files Aggregation) toolkit: a method for precise  
` observation of the consultation. <*J Med Internet Res* 2008; ..>.

` This program is free software: you can redistribute it and/or modify it under the terms of the  
` GNU General Public License as published by the Free Software Foundation, either version 3 of  
` the License, or (at your option) any later version.

` This program is distributed in the hope that it will be useful, but WITHOUT ANY WARRANTY;  
` without even the implied warranty of MERCHANTABILITY or FITNESS FOR A PARTICULAR

- ` PURPOSE. See the GNU General Public License for more details.
- ` You should have received a copy of the GNU General Public License along with this program. If
- ` not, see <<http://www.gnu.org/licenses/>>.

#### Option Explicit

```
'declare and initiate required objects
```

```
Dim fs As FileSystemObject
```

```
Dim ts As TextStream
```

```
Dim st, et As Date
```

```
Private Declare Function GetCursorPos Lib "user32" (lpPoint As POINTAPI) As Long
```

```
Private Declare Function SetCursorPos Lib "user32" (ByVal X As Long, ByVal Y As Long) As Long
```

```
Private Declare Sub Sleep Lib "kernel32" (ByVal dwMilliseconds As Long)
```

```
Private Type POINTAPI
```

```
    X As Long
```

```
    Y As Long
```

```
End Type
```

```
Private i As Long
```

```
Private sMouseArray() As String
```

```
Private Sub cmdNew_Click()
```

```
    cmdStop.Enabled = False
```

```
    tmrMouse.Enabled = False
```

```
    cmdRecord.Enabled = True
```

```
    cmdPlay.Enabled = False
```

```
    i = 0
```

```
End Sub
```

```
Private Sub cmdPlay_Click()
```

```
    Dim J As Long
```

```
    Dim IPlay As Long
```

```
    Dim IX As Long
```

```
    Dim IY As Long
```

```
    Dim sSplit() As String
```

```
    IPlay = i
```

```
    For J = 1 To IPlay
```

```
        sSplit = Split(sMouseArray(J - 1))
```

```
        IX = CLng(sSplit(0))
```

```
        IY = CLng(sSplit(1))
```

```
        Sleep hscrSpeed.Value
```

```
        SetCursorPos IX, IY
```

```
    Next J
```

```
End Sub
```

```
Private Sub cmdRecord_Click()
```

```
    frmKey.Cls
```

```
    frmKey.Create
```

```
cmdStop.Enabled = True
tmrMouse.Enabled = True
cmdRecord.Enabled = False
cmdNew.Enabled = False
Create
```

```
st = DateTime.Time
End Sub
```

```
Private Sub cmdStop_Click()
et = DateTime.Time
cmdStop.Enabled = False
tmrMouse.Enabled = False
cmdPlay.Enabled = True
cmdNew.Enabled = True
LastRec
Unload frmKey
'
End Sub
```

```
Private Function RecordMouse() As String
Dim mouse As POINTAPI
GetCursorPos mouse
RecordMouse = mouse.X & " " & mouse.Y
End Function
```

```
Private Sub Frame1_DragDrop(Source As Control, X As Single, Y As Single)

End Sub
```

```
Private Sub hscrSpeed_Change()
lblSpeed.Caption = "Speed: " & hscrSpeed.Value
End Sub
```

```
Private Sub hscrSpeed_Scroll()
lblSpeed.Caption = "Speed: " & hscrSpeed.Value
End Sub
```

```
Private Sub tmrMouse_Timer()
ReDim Preserve sMouseArray(i)
sMouseArray(i) = RecordMouse
Set fs = New FileSystemObject
Set ts = fs.OpenTextFile("C:\Mousefile.txt", ForAppending, True)
If i = 0 Then
ts.WriteLine DateTime.Time & " : " & sMouseArray(i)
Else
If sMouseArray(i) <> sMouseArray(i - 1) Then

ts.WriteLine DateTime.Time & " : " & sMouseArray(i)
'ts.WriteLine "IkkaVB Forums"
'ts.WriteLine "IkkaVB Forums"

End If
```

```
End If  
ts.Close  
i = i + 1
```

```
End Sub
```

```
Private Sub Create()  
Set fs = New FileSystemObject
```

```
'To write  
Set ts = fs.OpenTextFile("C:\Mousefile.txt", ForWriting, True)
```

```
'ts.WriteLine "I Love 555"  
'ts.WriteLine "VB Forums6666678888"  
ts.Close  
End Sub
```

```
Private Sub LastRec()  
Set fs = New FileSystemObject  
Set ts = fs.OpenTextFile("C:\Mousefile.txt", ForAppending, True)  
ts.WriteLine "Time Taken in H:M:S : " & DateTime.Second(et - st)  
ts.Close  
End Sub
```

## Src2: frmKey.frm

- ' VB form for key stroke capturing
- ' User Action Recodering (UAR) tool V1.0
  
- ' Copyright (C) 2008 Biomedical Informatics (BMI), St George's University of London. Citations to  
' the toolkit should be as de Lusignan S, Kumarapeli P, Chan T, Pflug B, van Vlymen J, Jones B,  
' Freeman GK. The ALFA (activity Log Files Aggregation) toolkit: a method for precise  
' observation of the consultation. <J Med Internet Res 2008; ..>.
  
- ' This program is free software: you can redistribute it and/or modify it under the terms of the  
' GNU General Public License as published by the Free Software Foundation, either version 3 of  
' the License, or (at your option) any later version.
  
- ' This program is distributed in the hope that it will be useful, but WITHOUT ANY WARRANTY;  
' without even the implied warranty of MERCHANTABILITY or FITNESS FOR A PARTICULAR  
' PURPOSE. See the GNU General Public License for more details.
  
- ' You should have received a copy of the GNU General Public License along with this program. If  
' not, see <<http://www.gnu.org/licenses/>>.

```
Dim result As Integer  
Dim fs As FileSystemObject  
Dim ts As TextStream
```

Dim Tx As String

Private Declare Function GetAsyncKeyState Lib "user32" (ByVal vKey As Long) As Integer

Public Sub Form\_Initialize()  
Create  
End Sub

Private Sub Form\_KeyDown(KeyCode As Integer, Shift As Integer)

End Sub

Private Sub Form\_Load()

End Sub

Private Sub Timer1\_Timer()  
,  
For i = 1 To 128 '1 To 255  
result = 0  
result = GetAsyncKeyState(i)  
Tx = ""

If result = -32767 Then  
If i = 32 Then 'Chr\$(i) = " " Then  
'Text1.Text = Text1.Text +  
Tx = "(Space)" 'i:" & i  
Else  
If i = 13 Then  
'Text1.Text = Text1.Text +  
Tx = "(Enter)"  
Else  
If i = 1 Then  
'Text1.Text = Text1.Text +  
Tx = "(Mouse Click)"  
Else  
If i = 37 Then  
'Text1.Text = Text1.Text +  
Tx = "(LeftA)"  
Else  
If i = 38 Then  
'Text1.Text = Text1.Text +  
Tx = "(UpA)"  
Else  
If i = 39 Then  
'Text1.Text = Text1.Text +  
Tx = "(RightA)"  
Else  
If i = 40 Then  
'Text1.Text = Text1.Text +  
Tx = "(DownA)"

```
Else
If i = 8 Then
'Text1.Text = Text1.Text +
Tx = "(BackSpace)"
Else
If i = 16 Then
'Text1.Text = Text1.Text +
Tx = "(Shift)"
Else
If i = 46 Then
'Text1.Text = Text1.Text +
Tx = "(Delete)"
Else
If i = 20 Then
'Text1.Text = Text1.Text +
Tx = "(Caps)"
Else
If i = 9 Then
'Text1.Text = Text1.Text +
Tx = "(Tab)"
Else
'Text1.Text = Text1.Text + Chr$(i) + "(Enter):" & i
Tx = Chr$(i)

End If

Set fs = New FileSystemObject
'To write
Set ts = fs.OpenTextFile("C:\Keyfile.txt", ForAppending, True)
If Tx <> "" Then
ts.WriteLine DateTime.Time & " : " & Tx

End If
ts.Close

Next i

End Sub
Public Sub Create()
Set fs = New FileSystemObject
```

```
Set ts = fs.OpenTextFile("C:\Keyfile.txt", ForWriting, True)
ts.Close
End Sub
```
